# Supplementary material for: Modelling molecular adsorption on charged or polarized surfaces: a critical flaw in common approaches
Source: Royal Society of Chemistry journal article supplement (doi:10.1039/c7cp08209f), 2018-01-01
Supplement: c7cp08209f1.pdf [file c7cp08209f1.pdf]

*Supporting Information for*

**Modelling molecular adsorption on charged or polarized surfaces: a critical  
flaw in common approaches**

Kristof M. Bal and Erik C. Neyts

Department of Chemistry, University of Antwerp, Universiteitsplein 1, 2610 Antwerp,  
Belgium

**CHARGED HEXAGONAL BN**

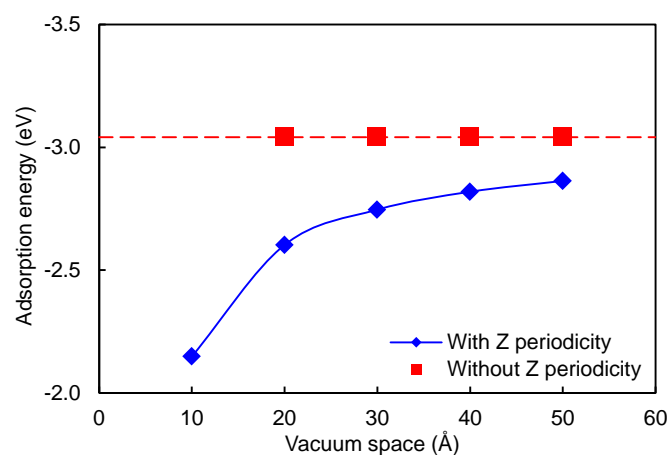

Figure S1: Convergence dependence of CO<sub>2</sub> adsorption energies on charged *h*-BN on the vacuum space for both fully as partially periodic cells.

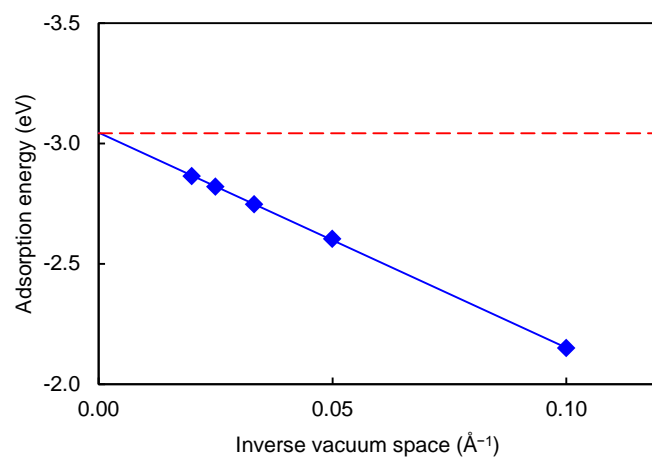

Figure S2: Extrapolation of CO<sub>2</sub> adsorption energies on charged *h*-BN for both fully as partially periodic cells to infinite vacuum.

#### HEXAGONAL BN SUBJECTED TO AN ELECTRIC FIELD

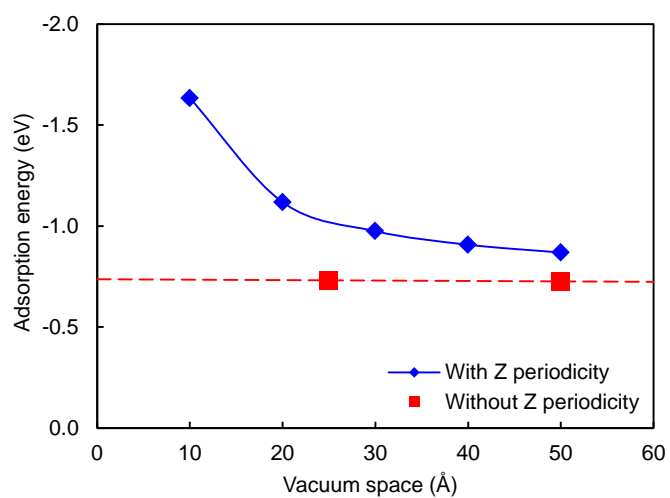

Figure S3: Convergence dependence of electric field-enhanced CO<sub>2</sub> adsorption energies on *h*-BN on the vacuum space for both fully as partially periodic cells.

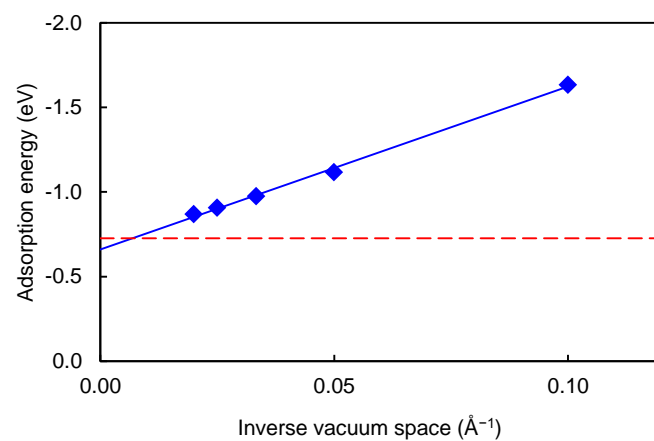

Figure S4: Extrapolation of electric field-enhanced CO<sub>2</sub> adsorption energies on *h*-BN for both fully as partially periodic cells to infinite vacuum.
